# Supplementary material for: High performance tin diselenide photodetectors dependent on thickness: a vertical graphene sandwiched device and interfacial mechanism
Source: Royal Society of Chemistry journal article supplement (doi:10.1039/c9nr01966a), 2019-01-01
Supplement: c9nr01966a1.pdf [file c9nr01966a1.pdf]

**Supporting Information for**

**High performance Tin Diselenide photodetectors dependent on thickness:**

**Vertical graphene sandwiched device and interfacial mechanism**

Wei Gao<sup>1</sup>, Zhaoqiang Zheng<sup>1\*</sup>, Yongtao Li<sup>1</sup>, Yu Zhao<sup>1</sup>, Liang Xu<sup>3</sup>, Huixiong Deng<sup>2\*</sup>,

Jingbo Li<sup>1,2\*</sup>

<sup>1</sup> School of Materials and Energy, Guangdong University of Technology, Guangzhou 510006, P. R. China.

<sup>2</sup> State Key Laboratory of Superlattices and Microstructures, Institute of Semiconductors, Chinese Academy of Sciences, Beijing 100083, P. R. China.

<sup>3</sup> Zhejiang Bright Semiconductor Technology Co. Ltd., Jinhua, Zhejiang, 321000, P. R. China.

\* Corresponding authors: zhengzhq5@mail2.sysu.edu.cn; hxdeng@semi.ac.cn; and jbli@semi.ac.cn

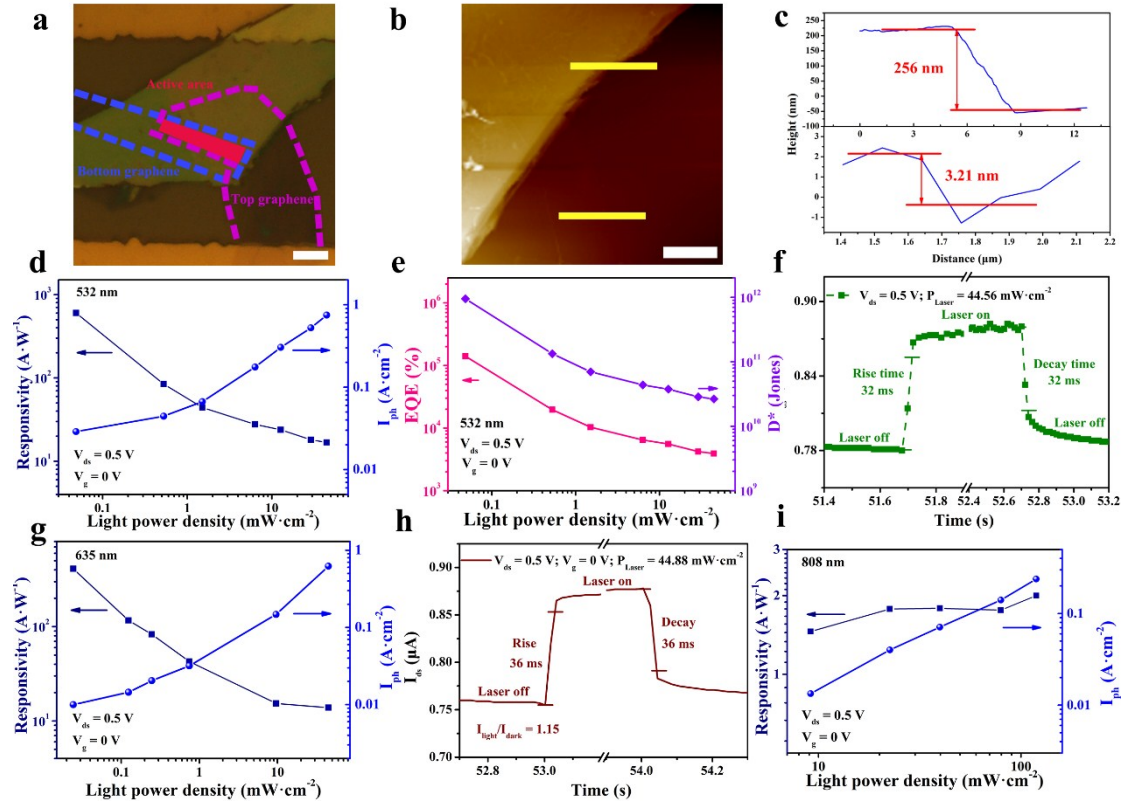

**Fig. S1** Optoelectrical characteristics of the Gr-SnSe<sub>2</sub> (256 nm)-Gr heterostructure. (a) Optical image of the heterostructure. The scale bar is 5  $\mu\text{m}$ . (b) Atomic Force microscopy (AFM) topography at the interface of the top graphene and SnSe<sub>2</sub>. (c) The corresponding thickness of the SnSe<sub>2</sub> and top graphene from (d) Responsivity and photocurrent density by 532 nm laser as a function of light power density under  $V_{\text{ds}} = 0.5 \text{ V}$ ,  $V_{\text{g}} = 0 \text{ V}$ . (e) EQE and Detectivity as a function of light power density. (f) Rising and decay time of the Gr-SnSe<sub>2</sub>-Gr under a 532 nm illumination at  $V_{\text{g}} = 0 \text{ V}$ . (g) Responsivity and photocurrent density by 635 nm laser as a function of light power density under  $V_{\text{ds}} = 0.5 \text{ V}$ ,  $V_{\text{g}} = 0 \text{ V}$ . (h) Rising and decay time of the Gr-SnSe<sub>2</sub>-Gr under a 635 nm illumination at  $V_{\text{g}} = 0 \text{ V}$ . (i) Responsivity and photocurrent density by 808 nm laser as a function of light power density under  $V_{\text{ds}} = 0.5 \text{ V}$ ,  $V_{\text{g}} = 0 \text{ V}$ .

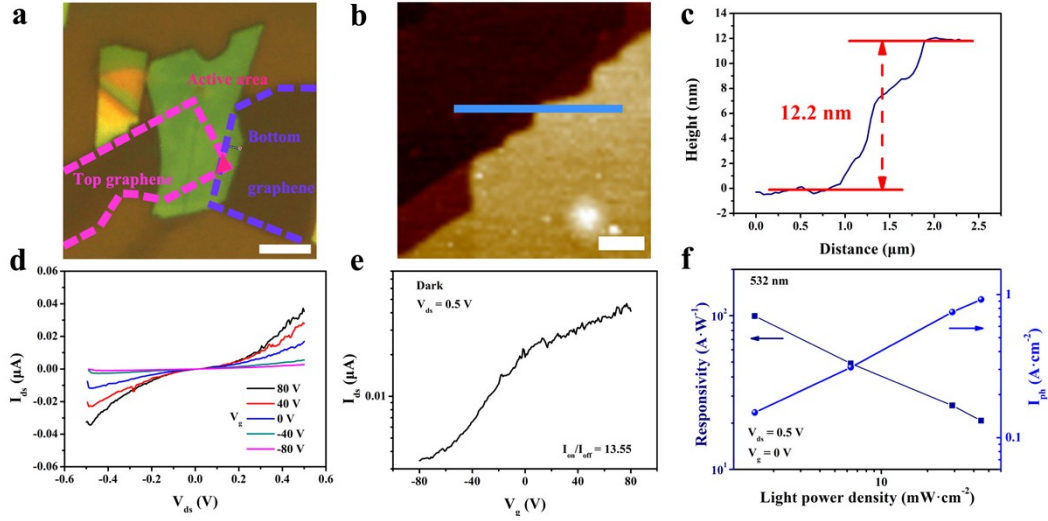

**Fig. S2** (Opto) electrical characteristics of the vertical Gr-SnSe<sub>2</sub> (12.2 nm)-Gr heterostructure. (a) Optical image of the heterostructure. The scale bar is 5  $\mu\text{m}$ . (b) Atomic Force microscopy (AFM) topography at the interface of SnSe<sub>2</sub>. (c) The corresponding thickness of SnSe<sub>2</sub> from (d) Output characteristic curves of the device under  $V_g$  from 80 V to -80 V. (e) Transfer characteristic curves of the device correlated to  $V_g$ . (f) Responsivity by 532 nm laser as a function of light power density under  $V_{ds} = 0.5$  V,  $V_g = 0$  V.

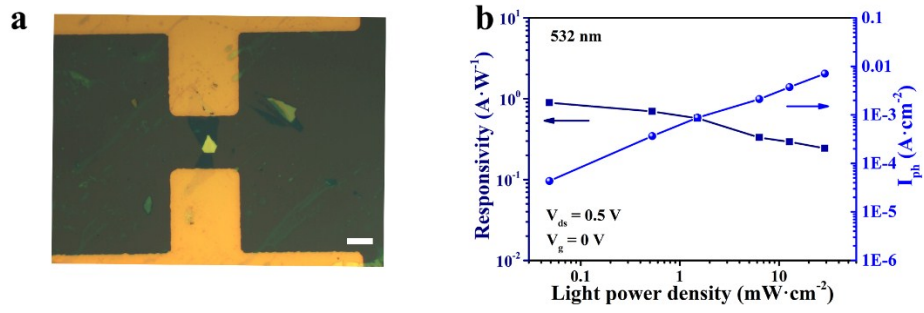

**Fig. S3** (Opto) electrical characteristics of the vertical Gr-SnSe<sub>2</sub> (30.1 nm)-Gr heterostructure. (a) Optical image of the heterostructure. The scale bar is 10  $\mu\text{m}$ . (b) Responsivity by 532 nm laser as a function of light power density under  $V_{\text{ds}} = 0.5 \text{ V}$ ,  $V_{\text{g}} = 0 \text{ V}$ .

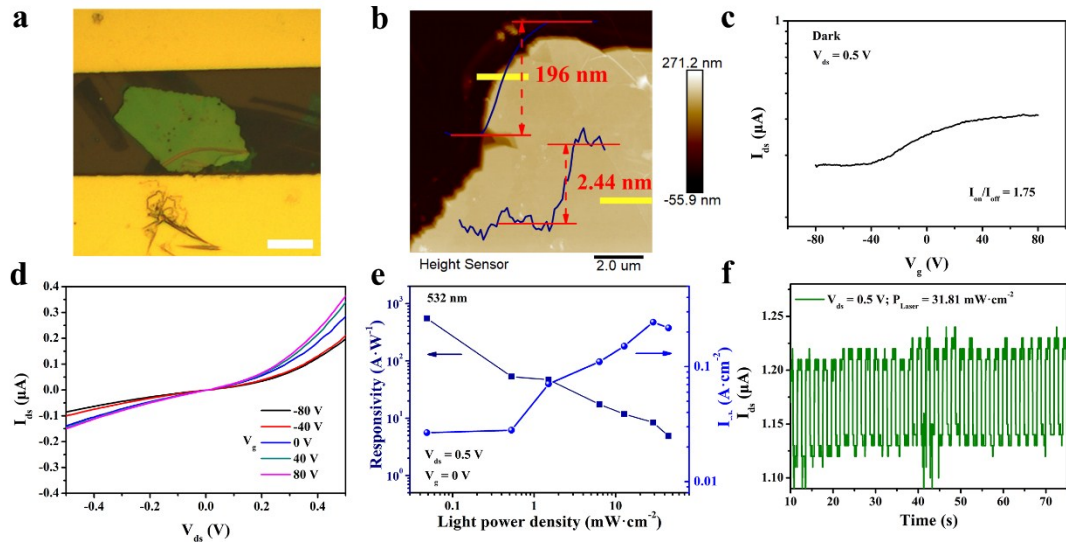

**Fig. S4** (Opto) electrical characteristics of the vertical Gr-SnSe<sub>2</sub> (196 nm)-Gr device.

(a) Optical image of the heterostructure. The scale bar is 10 μm. (b) Atomic Force microscopy (AFM) topography at the interface of SnSe<sub>2</sub> and the corresponding thickness of the SnSe<sub>2</sub> along the yellow line. (c) Transfer characteristic curves of the device correlated to V<sub>g</sub>. (d) Output characteristic curves of the device under V<sub>g</sub> from 80 V to -80 V. (e) Responsivity and photocurrent density by a 532 nm laser as a function of light power density under V<sub>ds</sub> = 0.5 V, V<sub>g</sub> = 0V. (f) Rising and decay time of the device under a 532 nm illumination at V<sub>ds</sub> = 0.5 V, V<sub>g</sub> = 0 V.

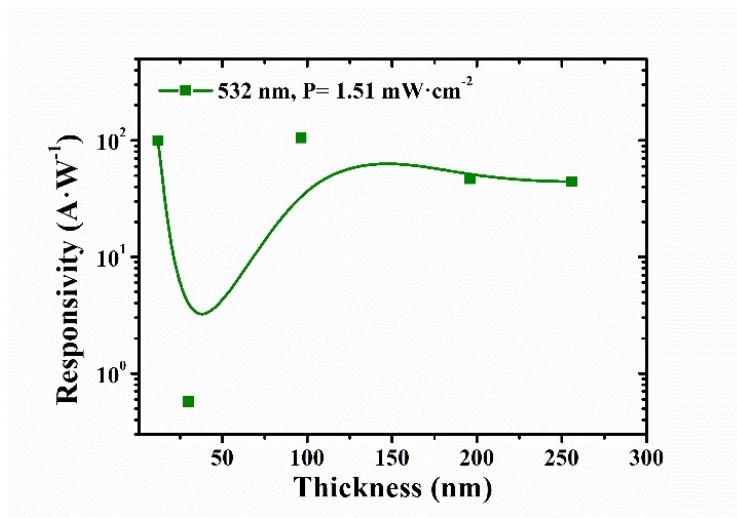

**Fig. S5** Thickness-dependent responsivity of SnSe<sub>2</sub> nanoflakes.

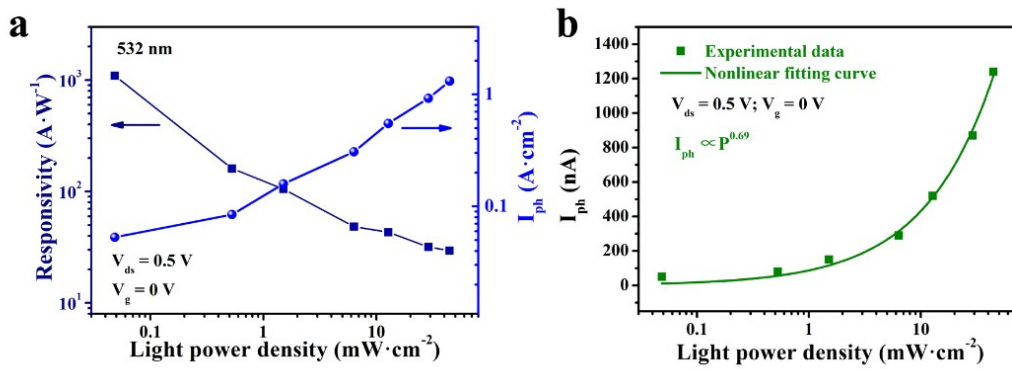

**Fig. S6** Optoelectrical characteristics of the Gr-SnSe<sub>2</sub> (96.5 nm)-Gr heterostructure. (a) Responsivity and photo-current density as a function of light power density. (b) Light power density dependence of the photocurrent.

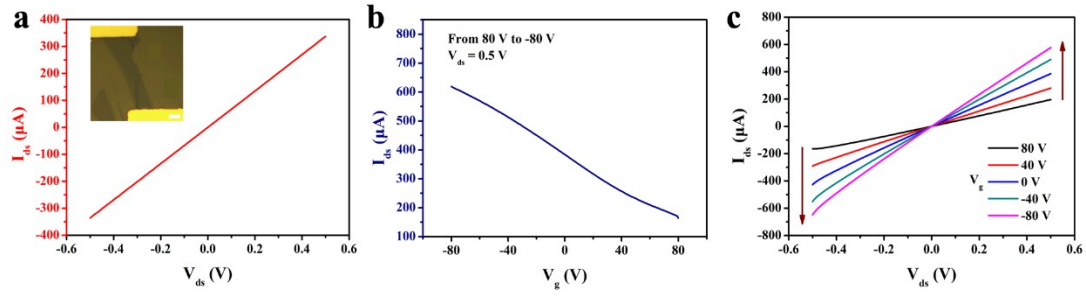

**Fig. S7** Electrical properties of the FETs devices for graphene. (a)  $I_{ds}$ - $V_{ds}$  characteristic curves without the gate voltage. (b) Transfer curves. (c) Output curves.

The scale bar is 10  $\mu m$ .

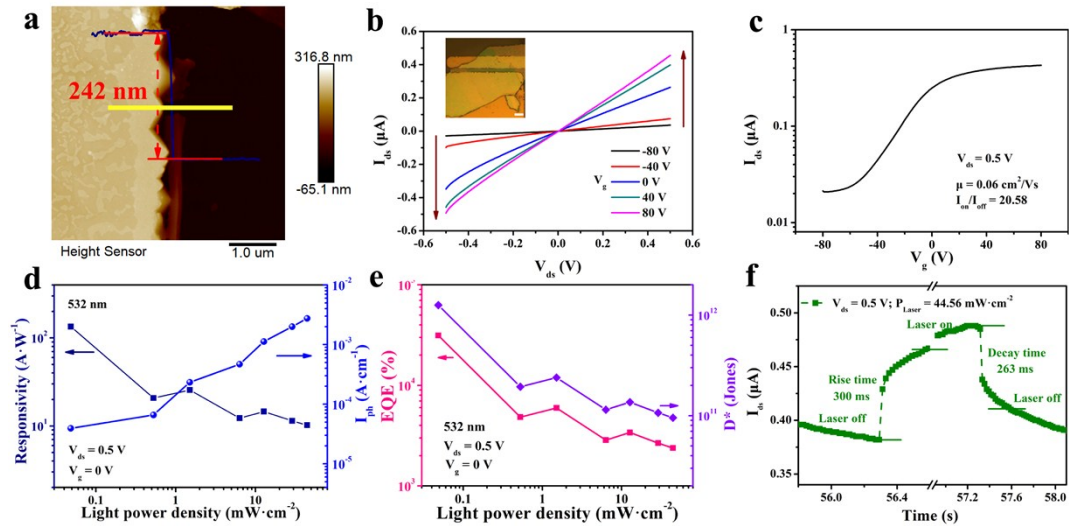

**Fig. S8** (Opto) electrical characteristics of the horizontal SnSe<sub>2</sub> (242 nm) device. (a) Atomic Force microscopy (AFM) topography at the interface of SnSe<sub>2</sub> and the corresponding thickness of the SnSe<sub>2</sub> along the yellow line. (b) Output characteristic curves of the device under  $V_g$  from 80 V to -80 V. (c) Transfer characteristic curves of the device correlated to  $V_g$ . (d) Responsivity and photocurrent density by a 532 nm laser as a function of light power density under  $V_{ds} = 0.5$  V,  $V_g = 0$  V. (e) EQE and Detectivity as a function of light power density. (f) Rising and decay time of the device under a 532 nm illumination at  $V_{ds} = 0.5$  V,  $V_g = 0$  V.

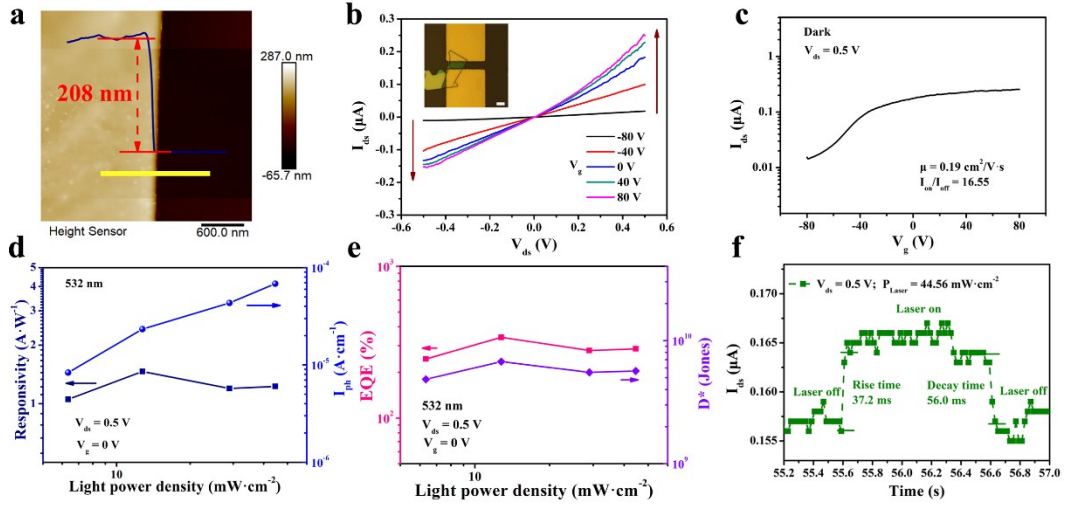

**Fig. S9** (Opto) electrical characteristics of the horizontal SnSe<sub>2</sub> (208 nm) device. (a) Atomic Force microscopy (AFM) topography at the interface of SnSe<sub>2</sub> and the corresponding thickness of the SnSe<sub>2</sub> along the yellow line. (b) Output characteristic curves of the device under  $V_g$  from -80 V to 80 V. (c) Transfer characteristic curves of the device correlated to  $V_g$ . (d) Responsivity and photocurrent density by a 532 nm laser as a function of light power density under  $V_{ds} = 0.5 \text{ V}$ ,  $V_g = 0 \text{ V}$ . (e) EQE and Detectivity as a function of light power density. (f) Rising and decay time of the device under a 532 nm illumination at  $V_{ds} = 0.5 \text{ V}$ ,  $V_g = 0 \text{ V}$ .



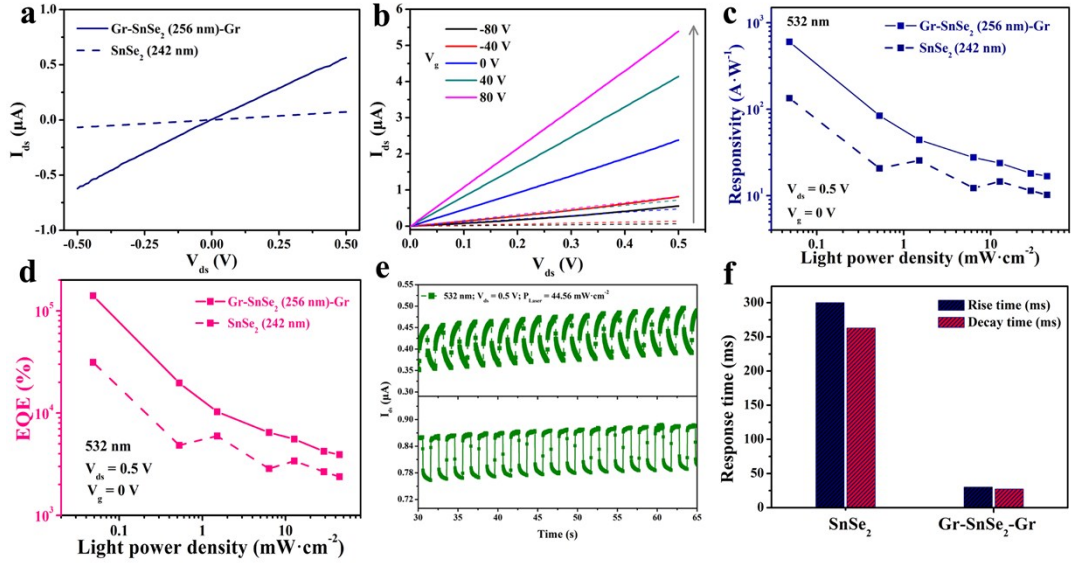

**Fig. S10 (Opto)** electrical characteristics of the Gr-SnSe<sub>2</sub> (256 nm)-Gr compared to the horizontal SnSe<sub>2</sub> (242nm) device under  $V_{ds} = 0.5$  V,  $V_g = 0$  V. (a)  $I_{ds}$ - $V_{ds}$  curve of the device. (b) Output characteristic curves of the device under  $V_g$  from -80 V to 80 V. (c) Responsivity by 532 nm laser as a function of light power density. (d) EQE and Detectivity as a function of light power density. (e) Time trace of SnSe<sub>2</sub> (top) and Gr-SnSe<sub>2</sub>-Gr (bottom) under a 532 nm illumination. (f) Rising and decay time of the device under a 532 nm illumination.

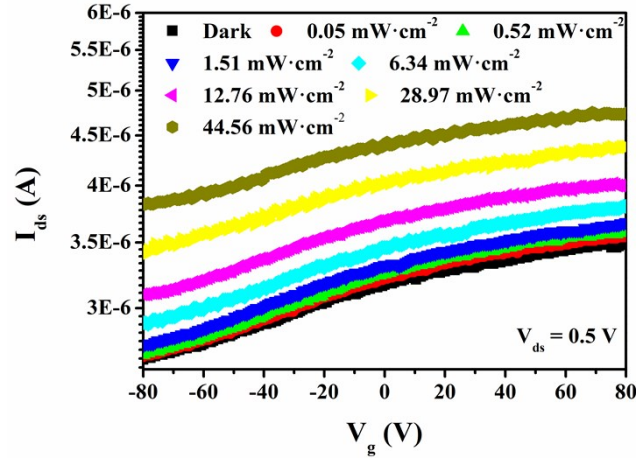

**Fig. S11** The  $I_{ds}$ - $V_g$  curves under 532 nm illumination as a function of light power density.

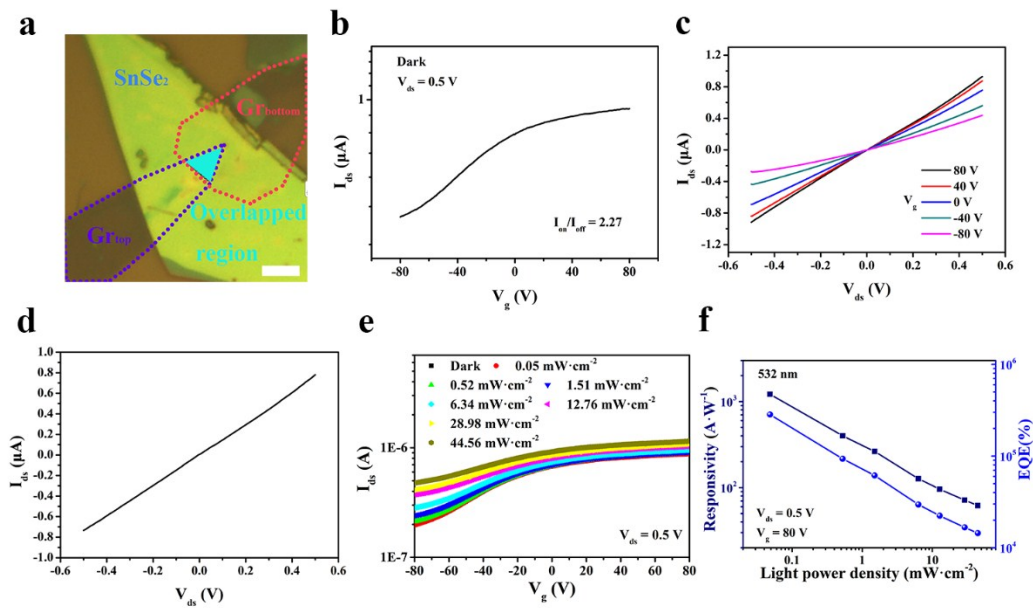

**Fig. S12** (Opto) electrical characteristics of the vertical Gr-SnSe<sub>2</sub>(~100 nm)-Gr device. (a) Optical image of the heterostructure. The scale bar is 5  $\mu\text{m}$ . (b) Transfer characteristic curves of the device correlated to  $V_g$ . (c) Output characteristic curves of the device under  $V_g$  from 80 V to -80 V. (d)  $I_{ds}$ - $V_{ds}$  curve under dark condition. (e) The  $I_{ds}$ - $V_g$  curves under 532 nm illumination as a function of light power density. (f) Responsivity and photo-current density as a function of light power density.

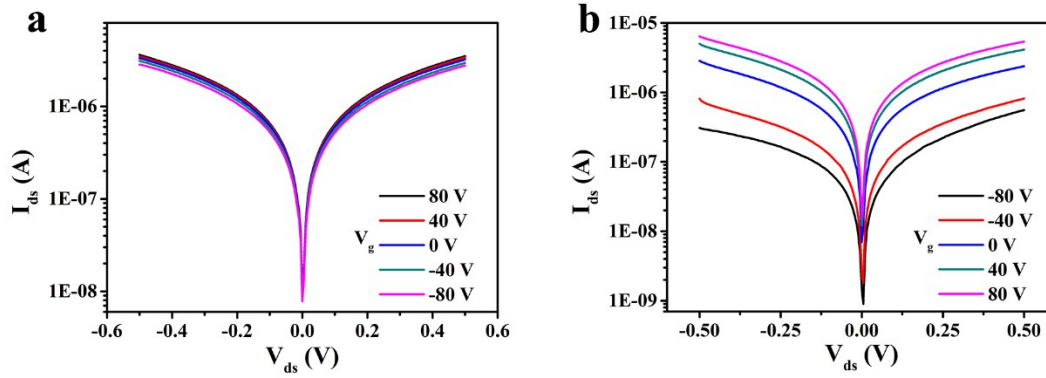

**Fig. S13** Electrical properties of the Vertical Gr-SnSe<sub>2</sub>-Gr devices dependent on different thickness: Logarithmic output characteristic curves of the device under  $V_g$  from 80 V to -80 V. (a) 96.5 nm. (b) 256 nm.

**Table S1** Comparison of figures-of-merit for vertical graphene-photodetectors based on 2D layered materials

| Materials                                         | Measurement condition                       | Responsivity (A/W) | EQE (%)         | D* (Jones)                     | Response time     | Ref.      |
|---------------------------------------------------|---------------------------------------------|--------------------|-----------------|--------------------------------|-------------------|-----------|
| Graphene-thick SnSe <sub>2</sub> -Graphene        | 532 nm<br>$V_g = 80$ V<br>$V_{ds} = 0.5$ V  | $1.3 \times 10^3$  | $3 \times 10^5$ | $1.2 \times 10^1$ <sup>2</sup> | 38.2 ms<br>/32 ms | This work |
| Graphene-MoTe <sub>2</sub> -Graphene              | 1064 nm<br>$V_g = 30$ V<br>$V_{ds} = 0$ V   | 0.11               | 12.9            | /                              | 24 $\mu$ s        | 1         |
| Graphene-n-InSe-Graphene                          | 633 nm<br>$V_g = 0$ V<br>$V_{ds} = 2$ V     | $10^5$             | $10^5$          | $10^{13}$                      | /                 | 2         |
| Graphene-MoS <sub>2</sub> -Graphene               | 514 nm<br>$V_g = -60$ V<br>$V_{ds} = 0.5$ V | /                  | 25              | /                              | 50 $\mu$ s        | 3         |
| Graphene-p-GaSe/n-InSe-Graphene                   | 410 nm<br>$V_g = 0$ V<br>$V_{ds} = 2$ V     | 350                | /               | $3.7 \times 10^1$ <sup>2</sup> | 2 $\mu$ s         | 4         |
| Graphene-Ta <sub>2</sub> O <sub>5</sub> -Graphene | 532 nm<br>$V_{ds} = 1$ V                    | $10^3$             | /               | /                              | 0.75 s            | 5         |

|                                                                    |                                                            |         |             |                          |                |   |
|--------------------------------------------------------------------|------------------------------------------------------------|---------|-------------|--------------------------|----------------|---|
| Graphene-WSe <sub>2</sub> /<br>GaSe-Graphene                       | 520 nm<br>V <sub>g</sub> = 0 V<br>V <sub>ds</sub> = -1.5 V | 6.2±0.2 | 1490±<br>50 | /                        | 30 μs          | 6 |
| Graphene-<br>GaSe/WS <sub>2</sub> -<br>Graphene                    | 410 nm<br>V <sub>g</sub> = 0 V<br>V <sub>ds</sub> = 2 V    | 149     | /           | 4.3×10 <sup>1</sup><br>2 | 37 μs/43<br>μs | 7 |
| Graphene-WSe <sub>2</sub><br>-Graphene                             | 759 nm<br>V <sub>g</sub> = 0 V<br>V <sub>ds</sub> = 0.5 V  | /       | 7.3         | /                        | 1.6 ns         | 8 |
| h-BN-Graphene-<br>MoS <sub>2</sub> /WSe <sub>2</sub> -<br>Graphene | 532 nm<br>V <sub>g</sub> = 0 V<br>V <sub>ds</sub> = 0 V    | 0.12    | 34          | /                        | /              | 9 |

## References

1. K. Zhang, X. Fang, Y. Wang, Y. Wan, Q. Song, W. Zhai and L. Dai, *ACS Appl. Mater. Inter.*, 2017, 9, 5392-5398.
2. G. W. Mudd, S. A. Svatek, L. Hague, O. Makarovskiy, Z. R. Kudrynskiy, C. J. Mellor and E. E. Vdovin, *Adv. Mater.*, 2015, 27, 3760-3766.
3. W. J. Yu, Y. Liu, H. Zhou, A. Yin, Z. Li, Y. Huang and X. Duan, *Nat. Nanotechnol.*, 2013, 8, 952-958.
4. F. Yan, L. Zhao, A. Patané, P. Hu, X. Wei, W. Luo and K. Chang, *Nanotechnology*, 2017, 28, 27LT01.
5. C. Liu, Y. Chang, T. B. Norris and Z. Zhong, *Nat. Nanotechnol.*, 2014, 9, 273-278.
6. X. Wei, F. Yan, Q. Lv, C. Shen and K. Wang, *Nanoscale*, 2017, 9, 8388-8392.
7. Q. Lv, F. Yan, X. Wei and K. Wang, *Adv. Opt. Mater.*, 2018, 6, 1700490.
8. M. Massicotte, P. Schmidt, F. Violla, K. G. Schädler, A. Reserbat-Plantey, K. Watanabe, T. Taniguchi, K. J. Tielrooij and F. H. Koppens, *Nat. Nanotechnol.*, 2016, 11, 42-46.

9. C. H. Lee, G. H. Lee, A. M. Van Der Zande, W. Chen, Y. Li, M. Han, X. Cui, G. Arefe, C. Nuckolls, T. F. Heinz, J. Guo, J. Hone and P. Kim, *Nat. Nanotechnol.*, 2014, 9, 676-681.
